# Supplementary material
Source: publisher site journal article supplement (https://www.dovepress.com/article/373107)

**Supplemental Table 1** Epoch-by-epoch analysis results for scheduled sleep episodes

|  | Sensitivity | Specificity | PPV | NPV | F1 | Cohen’s kappa |
| --- | --- | --- | --- | --- | --- | --- |
|  | **Averaged across Participants and Protocols** | | | | | |
| Cole-Kripke | 0.636 (0.588, 0.684) | 0.920 (0.877, 0.962) | 0.980 (0.970, 0.991) | 0.256 (0.194, 0.319) | 0.757 (0.717, 0.798) | 0.245 (0.188, 0.303) |
| Actiware (low) | 0.930 (0.916, 0.943) | 0.580 (0.507, 0.654) | 0.924 (0.895, 0.953) | 0.449 (0.370, 0.527) | 0.923 (0.907, 0.940) | 0.363 (0.313, 0.413) |
| Actiware (medium) | 0.966 (0.958, 0.973) | 0.482 (0.404, 0.560) | 0.913 (0.882, 0.945) | 0.552 (0.474, 0.631) | 0.935 (0.917, 0.954) | 0.386 (0.331, 0.441) |
| Actiware (high) | 0.988 (0.985, 0.991) | 0.354 (0.281, 0.427) | 0.902 (0.868, 0.936) | 0.686 (0.604, 0.769) | 0.939 (0.918, 0.960) | 0.369 (0.305, 0.434) |
|  | **Circadian Alignment Protocol (Nighttime Sleep)** | | | | | |
| Cole-Kripke | 0.609 (0.527, 0.691) | 0.928 (0.862, 0.994) | 0.993 (0.987, 0.999) | 0.121 (0.071, 0.170) | 0.738 (0.664, 0.812) | 0.127 (0.066, 0.187) |
| Actiware (low) | 0.927 (0.908, 0.945) | 0.621 (0.506, 0.737) | 0.975 (0.963, 0.988) | 0.273 (0.189, 0.357) | 0.950 (0.938, 0.961) | 0.297 (0.220, 0.374) |
| Actiware (medium) | 0.965 (0.955, 0.975) | 0.522 (0.402, 0.643) | 0.972 (0.957, 0.986) | 0.393 (0.287, 0.498) | 0.968 (0.959, 0.977) | 0.365 (0.272, 0.458) |
| Actiware (high) | 0.988 (0.983, 0.992) | 0.365 (0.250, 0.479) | 0.966 (0.950, 0.982) | 0.539 (0.401, 0.676) | 0.976 (0.968, 0.985) | 0.369 (0.266, 0.472) |
|  | **Circadian Misalignment Protocol (Daytime Sleep)** | | | | | |
| Cole-Kripke | 0.659 (0.600, 0.718) | 0.912 (0.852, 0.972) | 0.969 (0.951, 0.987) | 0.375 (0.290, 0.460) | 0.774 (0.730, 0.818) | 0.349 (0.276, 0.422) |
| Actiware (low) | 0.933 (0.911, 0.954) | 0.544 (0.445, 0.644) | 0.879 (0.832, 0.927) | 0.602 (0.508, 0.696) | 0.900 (0.873, 0.927) | 0.421 (0.360, 0.481) |
| Actiware (medium) | 0.966 (0.954, 0.978) | 0.447 (0.339, 0.555) | 0.863 (0.811, 0.914) | 0.692 (0.608, 0.777) | 0.906 (0.876, 0.937) | 0.404 (0.334, 0.475) |
| Actiware (high) | 0.988 (0.984, 0.992) | 0.345 (0.242, 0.447) | 0.847 (0.792, 0.901) | 0.815 (0.746, 0.885) | 0.906 (0.873, 0.940) | 0.370 (0.282, 0.458) |

**Notes:** Data presented as mean (95%CI).

**Abbreviations:** PPV, positive predictive value; NPV, negative predictive value.

**Supplemental Table 2** Summary of actigraphy scoring for scheduled sleep episodes

|  | **Experiment 1**  (Non-shift-workers) | **Experiment 2**  (Shift-workers) |
| --- | --- | --- |
| Circadian Alignment Protocol (Nighttime sleep) | | |
| Number of epochs scored as sleep |  |  |
| Cole-Kripke | 480.83 (187.36), 331.75-608.5 | 306.33 (60.03), 264-338.5 |
| Actiware (low) | 816.42 (73.27), 774.25-868.25 | 427.33 (19.01), 409.5-439 |
| Actiware (medium) | 867.75 (54.54), 828-904 | 444.11 (16.01), 428.5-456.5 |
| Actiware (high) | 906.75(40.29), 889.75-937.25 | 459.22 (10.21), 450.5-469 |
| Number of epochs scored as wake |  |  |
| Cole-Kripke | 473.33 (178.51), 351.5-628.25 | 169.44 (58.07), 140.5-208.5 |
| Actiware (low) | 137.75 (70.44), 90.25-165.75 | 48.44 (17.35), 39.5-62 |
| Actiware (medium) | 86.42 (53.06), 56-97 | 31.67 (14.82), 21.5-43 |
| Actiware (high) | 47.42 (36.70), 22-56 | 16.56 (9.19), 9-20.5 |
| Circadian Misalignment Protocol (Daytime sleep) | | |
| Number of epochs scored as sleep |  |  |
| Cole-Kripke | 525.31 (180.36), 379-702 | 242.45 (56.94), 225-277 |
| Actiware (low) | 784.92 (116.23), 724.5-871.5 | 400.45 (25.37), 384-417 |
| Actiware (medium) | 833.46 (97.18), 775.5-907 | 427.00 (20.36), 413-442 |
| Actiware (high) | 878.15 (73.58), 827.5-932.5 | 447.09 (13.66), 438-457 |
| Number of epochs scored as wake |  |  |
| Cole-Kripke | 426.77 (172.53), 255.5-553 | 236.91 (57.18), 202-255 |
| Actiware (low) | 167.15 (106.50), 88.5-235.5 | 78.91 (25.76), 61-96 |
| Actiware (medium) | 118.62 (85.72), 53-184.5 | 52.36 (20.72), 37-67 |
| Actiware (high) | 73.92 (59.90), 27.5-132.5 | 32.27 (13.81), 22-42 |

Data presented as mean (standard deviation), interquartile range.

**Supplemental Table 3** Sensitivity by sleep stages

|  | NREM light sleep  (N1 and N2) | Slow wave sleep (N3) | REM sleep |
| --- | --- | --- | --- |
| **Circadian Alignment Protocol (Nighttime Sleep)** | | | |
| Cole-Kripke | 0.562 (0.467, 0.657) | 0.838 (0.748, 0.928) | 0.476 (0.345, 0.607) |
| Actiware (low) | 0.919 (0.893, 0.944) | 0.979 (0.970, 0.989) | 0.894 (0.859, 0.929) |
| Actiware (medium) | 0.962 (0.948, 0.977) | 0.991 (0.986, 0.996) | 0.953 (0.937, 0.969) |
| Actiware (high) | 0.987 (0.980, 0.993) | 0.997 (0.995, 1.000) | 0.983 (0.974, 0.992) |
| **Circadian Misalignment Protocol (Daytime Sleep)** | | | |
| Cole-Kripke | 0.562 (0.488, 0.634) | 0.887 (0.849, 0.925) | 0.588 (0.487, 0.689) |
| Actiware (low) | 0.916 (0.885, 0.946) | 0.981 (0.974, 0.988) | 0.924 (0.895, 0.954) |
| Actiware (medium) | 0.958 (0.942, 0.974) | 0.990 (0.987, 0.994) | 0.962 (0.945, 0.980) |
| Actiware (high) | 0.985 (0.978, 0.992) | 0.998 (0.996, 1.000) | 0.986 (0.979, 0.993) |

**Notes:** Data presented as estimate (95%CI). We defined an actigraphy epoch as a true NREM light sleep, slow wave sleep, or REM sleep when the three corresponding PSG epochs were unanimously NREM light sleep, slow wave sleep, or REM sleep, respectively.

**Abbreviations:** NREM, non-rapid eye movement; REM, rapid eye movement.

**Supplemental Table 4** Characteristics of wake bouts and activity levels within different sleep stages during scheduled sleep episodes

|  | Circadian Alignment Protocol (Nighttime Sleep) | Circadian Misalignment Protocol (Daytime Sleep) | Comparisona |
| --- | --- | --- | --- |
| Number of wake bouts | 14.52 (7.01), 8-20.75 | 15.46 (8.06), 9.13-21.75 | p = .780 |
| Duration of wake bouts (min) | 3.07 (6.26), 1-2.25 | 6.99 (19.44), 1-4 | p <.001 |
| Mean activity counts in each wake bout | 65.73 (84.49), 13-85.63 | 58.31 (90.88), 1-78 | p < .001 |
| Mean activity counts during wake epochs | 71.79 (60.36), 26.31-125.91 | 75.41 (57.24), 28.72-129.23 | p = .485 |
| Mean activity counts during sleep epochs | 3.36 (2.24), 1.85-4.51 | 2.68 (1.76), 1.48-3.69 | p = .092 |
| Mean activity counts during NREM light sleep (N1 and N2) | 3.50 (3.06), 0.96-4.45 | 3.19 (2.79), 1.27-4.06 | p = .818 |
| Mean activity counts during slow wave sleep | 1.05 (1.53), 0-1.92 | 0.65 (0.68), 0.08-1.27 | p = .681 |
| Mean activity counts during REM sleep | 4.77 (3.66), 1.97-6.14 | 3.02 (2.25), 1.25-4.94 | p = .010 |

**Note.** Data presented as mean (standard deviation), interquartile range.

aBecause the outcome variables were not normally distributed, all statistical comparisons were based on log-transformed outcome values.

**Abbreviations:** NREM, non-rapid movement; REM, rapid eye movement.

**Supplemental Table 5** Epoch-by-epoch analysis results for 24-hour periods

|  | Specificity | PPV | NPV | F1 | Cohen’s kappa |
| --- | --- | --- | --- | --- | --- |
|  | **Circadian Alignment Protocol (Nighttime Sleep)** | | | | |
| Cole-Kripke | 0.921 (0.901, 0.941) | 0.798 (0.756, 0.841) | 0.845 (0.822, 0.869) | 0.668 (0.605, 0.731) | 0.557 (0.495, 0.619) |
| Actiware (low) | 0.713 (0.666, 0.760) | 0.609 (0.571, 0.647) | 0.957 (0.950, 0.965) | 0.731 (0.707, 0.754) | 0.561 (0.516, 0.606) |
| Actiware (medium) | 0.627 (0.572, 0.681) | 0.552 (0.517, 0.588) | 0.977 (0.971, 0.982) | 0.699 (0.672, 0.726) | 0.495 (0.441, 0.548) |
| Actiware (high) | 0.499 (0.441, 0.558) | 0.482 (0.453, 0.511) | 0.989 (0.986, 0.993) | 0.645 (0.620, 0.670) | 0.382 (0.329, 0.435) |
|  | **Circadian Misalignment Protocol (Daytime Sleep)** | | | | |
| Cole-Kripke | 0.919 (0.905, 0.932) | 0.739 (0.703, 0.776) | 0.885 (0.866, 0.905) | 0.689 (0.647, 0.732) | 0.592 (0.544, 0.640) |
| Actiware (low) | 0.693 (0.656, 0.730) | 0.526 (0.483, 0.570) | 0.967 (0.957, 0.976) | 0.665 (0.630, 0.701) | 0.499 (0.454, 0.544) |
| Actiware (medium) | 0.609 (0.565, 0.653) | 0.476 (0.433, 0.519) | 0.981 (0.974, 0.987) | 0.631 (0.591, 0.670) | 0.433 (0.382, 0.484) |
| Actiware (high) | 0.488 (0.437, 0.539) | 0.415 (0.375, 0.455) | 0.991 (0.988, 0.995) | 0.578 (0.539, 0.618) | 0.333 (0.282, 0.385) |

**Notes:** Data presented are estimate (95%CI).

**Abbreviations:** PPV, positive predictive value; NPV, negative predictive value.

**Supplemental Table 6** Agreement between the Cole-Kripke algorithm, Actiware, and PSG on wake after sleep onset (WASO)

|  | PSG WASO min/night (Mean, SD, interquartile range) | Bias (Mean, SD, p-value) | Absolute difference (Mean, SD, p-value) | PSG-Actigraphy agreement (ICC, 95%CI) |
| --- | --- | --- | --- | --- |
| **Circadian Alignment Protocol; Nighttime Sleep** | | | | |
| Cole-Kripke | 19.20 (19.40), 6.88-23.00 | 145.04 (66.34), <.001 | 145.51 (65.24), <.001 | -0.07 (-0.48, 0.36) |
| Actiware (low) | 19.20 (19.40), 6.88-23.00 | 36.32 (25.25), <.001 | 38.42 (21.75), <.001 | 0.32 (-0.12, 0.65) |
| Actiware (medium) | 19.20 (19.40), 6.88-23.00 | 15.92 (20.10), .002 | 19.44 (16.52), <.001 | 0.43 (0.01, 0.72) |
| Actiware (high) | 19.20 (19.40), 6.88-23.00 | -0.08 (18.19), .983 | 11.42 (13.92), .001 | 0.40 (-0.03, 0.83) |
| **Circadian Misalignment Protocol; Daytime Sleep** | | | | |
| Cole-Kripke | 57.34 (50.25), 24.38-67.06 | 108.28 (66.79), <.001 | 108.82 (66.79), <.001 | 0.22 (-0.19, 0.57) |
| Actiware (low) | 57.34 (50.25), 24.38-67.06 | 18.91 (57.54), .121 | 45.14 (39.48), <.001 | 0.22 (-0.20, 0.56) |
| Actiware (medium) | 57.34 (50.25), 24.38-67.06 | -5.20 (51.82), .628 | 33.24 (39.51), <.001 | 0.36 (-0.16, 0.59) |
| Actiware (high) | 57.34 (50.25), 24.38-67.06 | -24.86 (48.82), .020 | 33.95 (42.73), <.001 | 0.22 (-0.19, 0.57) |

**Notes:** Bias was computed by subtracting PSG-measured WASO from WASO scored by the Cole-Kripke or Actiware algorithm. Positive values indicate that actigraphy-based algorithm overestimated WASO; negative values indicate that actigraphy-based algorithm underestimated WASO.

**Abbreviations:** ICC, intraclass correlation coefficient; PSG, polysomnography; WASO, wake after sleep onset.

**Supplemental Figure 1** The Bland-Altman plots for TST during ***scheduled sleep episodes*** between Cole-Kripke algorithm and PSG for nighttime (A) and daytime sleep (B), between Actiware (low threshold) and PSG for nighttime (C) and daytime sleep (D), between Actiware (medium threshold) and PSG for nighttime (E) and daytime sleep (F), and between Actiware (high threshold) and PSG for nighttime (G) and daytime sleep (H). Positive values indicate that actigraphy-based algorithm overestimated TST; negative values indicate that actigraphy-based algorithm underestimated TST. The horizontal dashed lines represent the 95% limits of agreement.

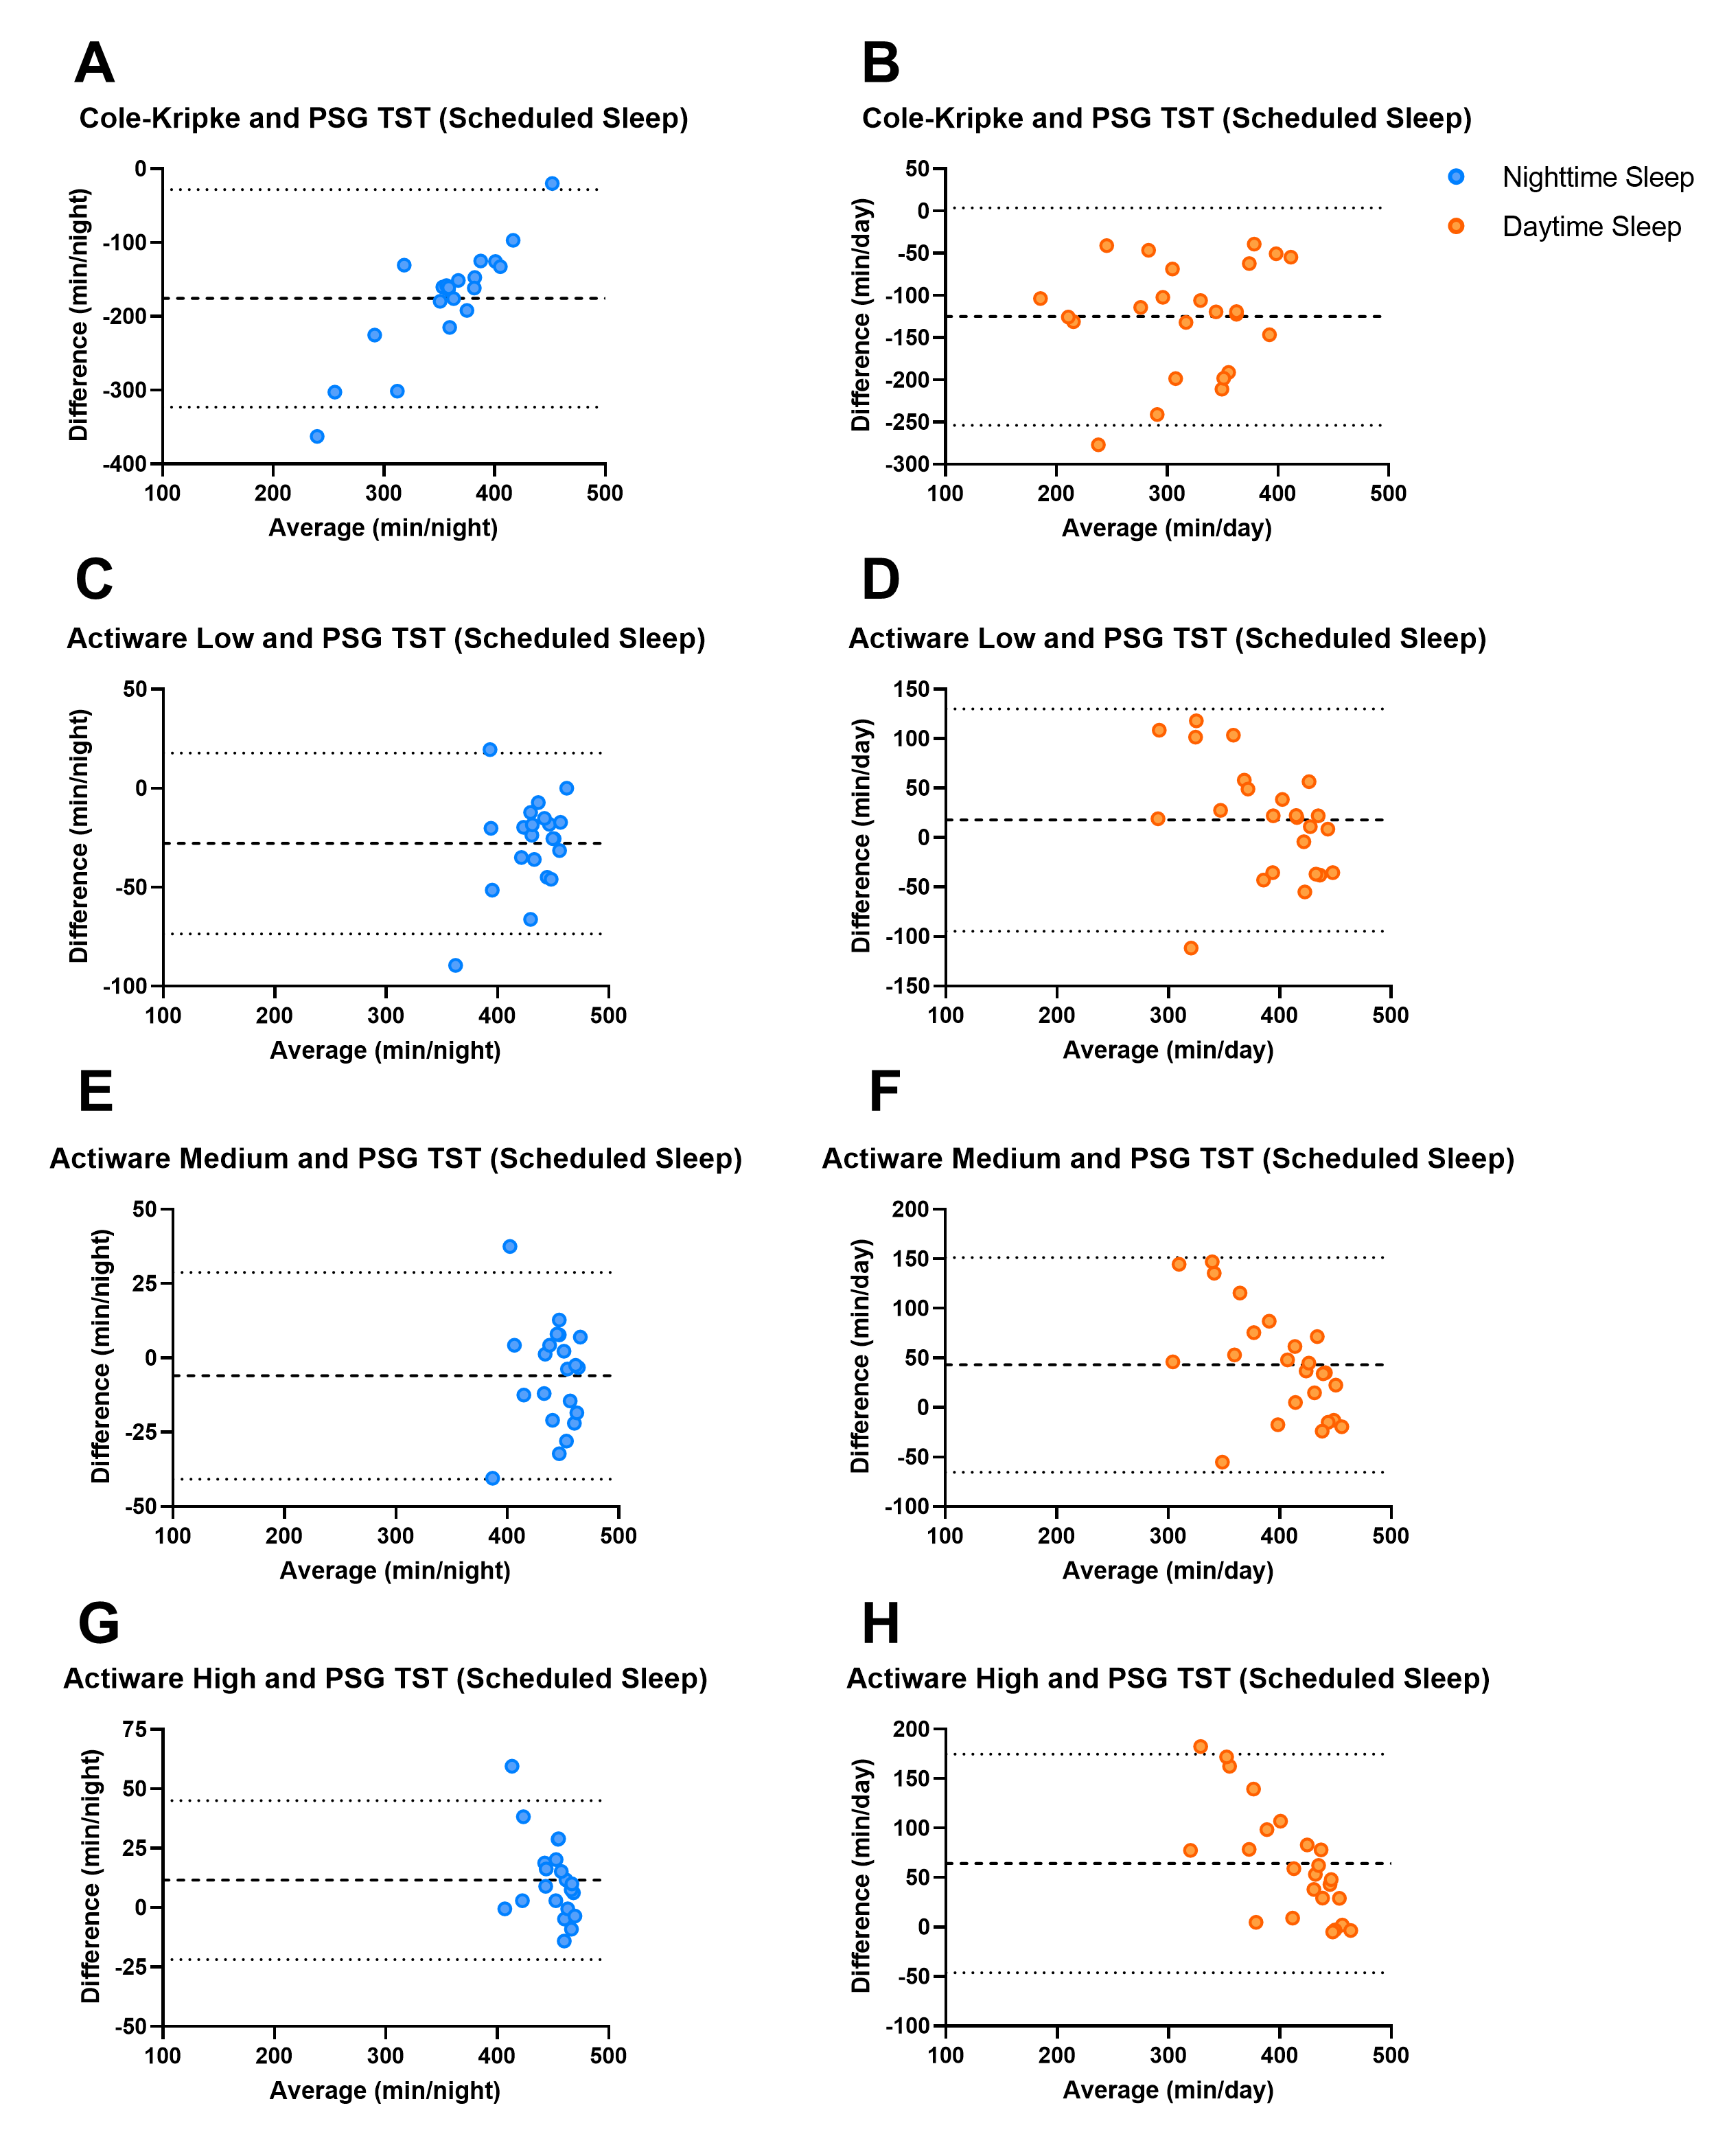


**Supplemental Figure 2** The Bland-Altman plots for TST during ***24-hour periods*** between Cole-Kripke algorithm and PSG for nighttime (A) and daytime sleep (B), between Actiware (low threshold) and PSG for nighttime (C) and daytime sleep (D), between Actiware (medium threshold) and PSG for nighttime (E) and daytime sleep (F), and between Actiware (high threshold) and PSG for nighttime (G) and daytime sleep (H). Positive values indicate that actigraphy-based algorithm overestimated TST; negative values indicate that actigraphy-based algorithm underestimated TST. The horizontal dashed lines represent the mean and 95% limits of agreement.
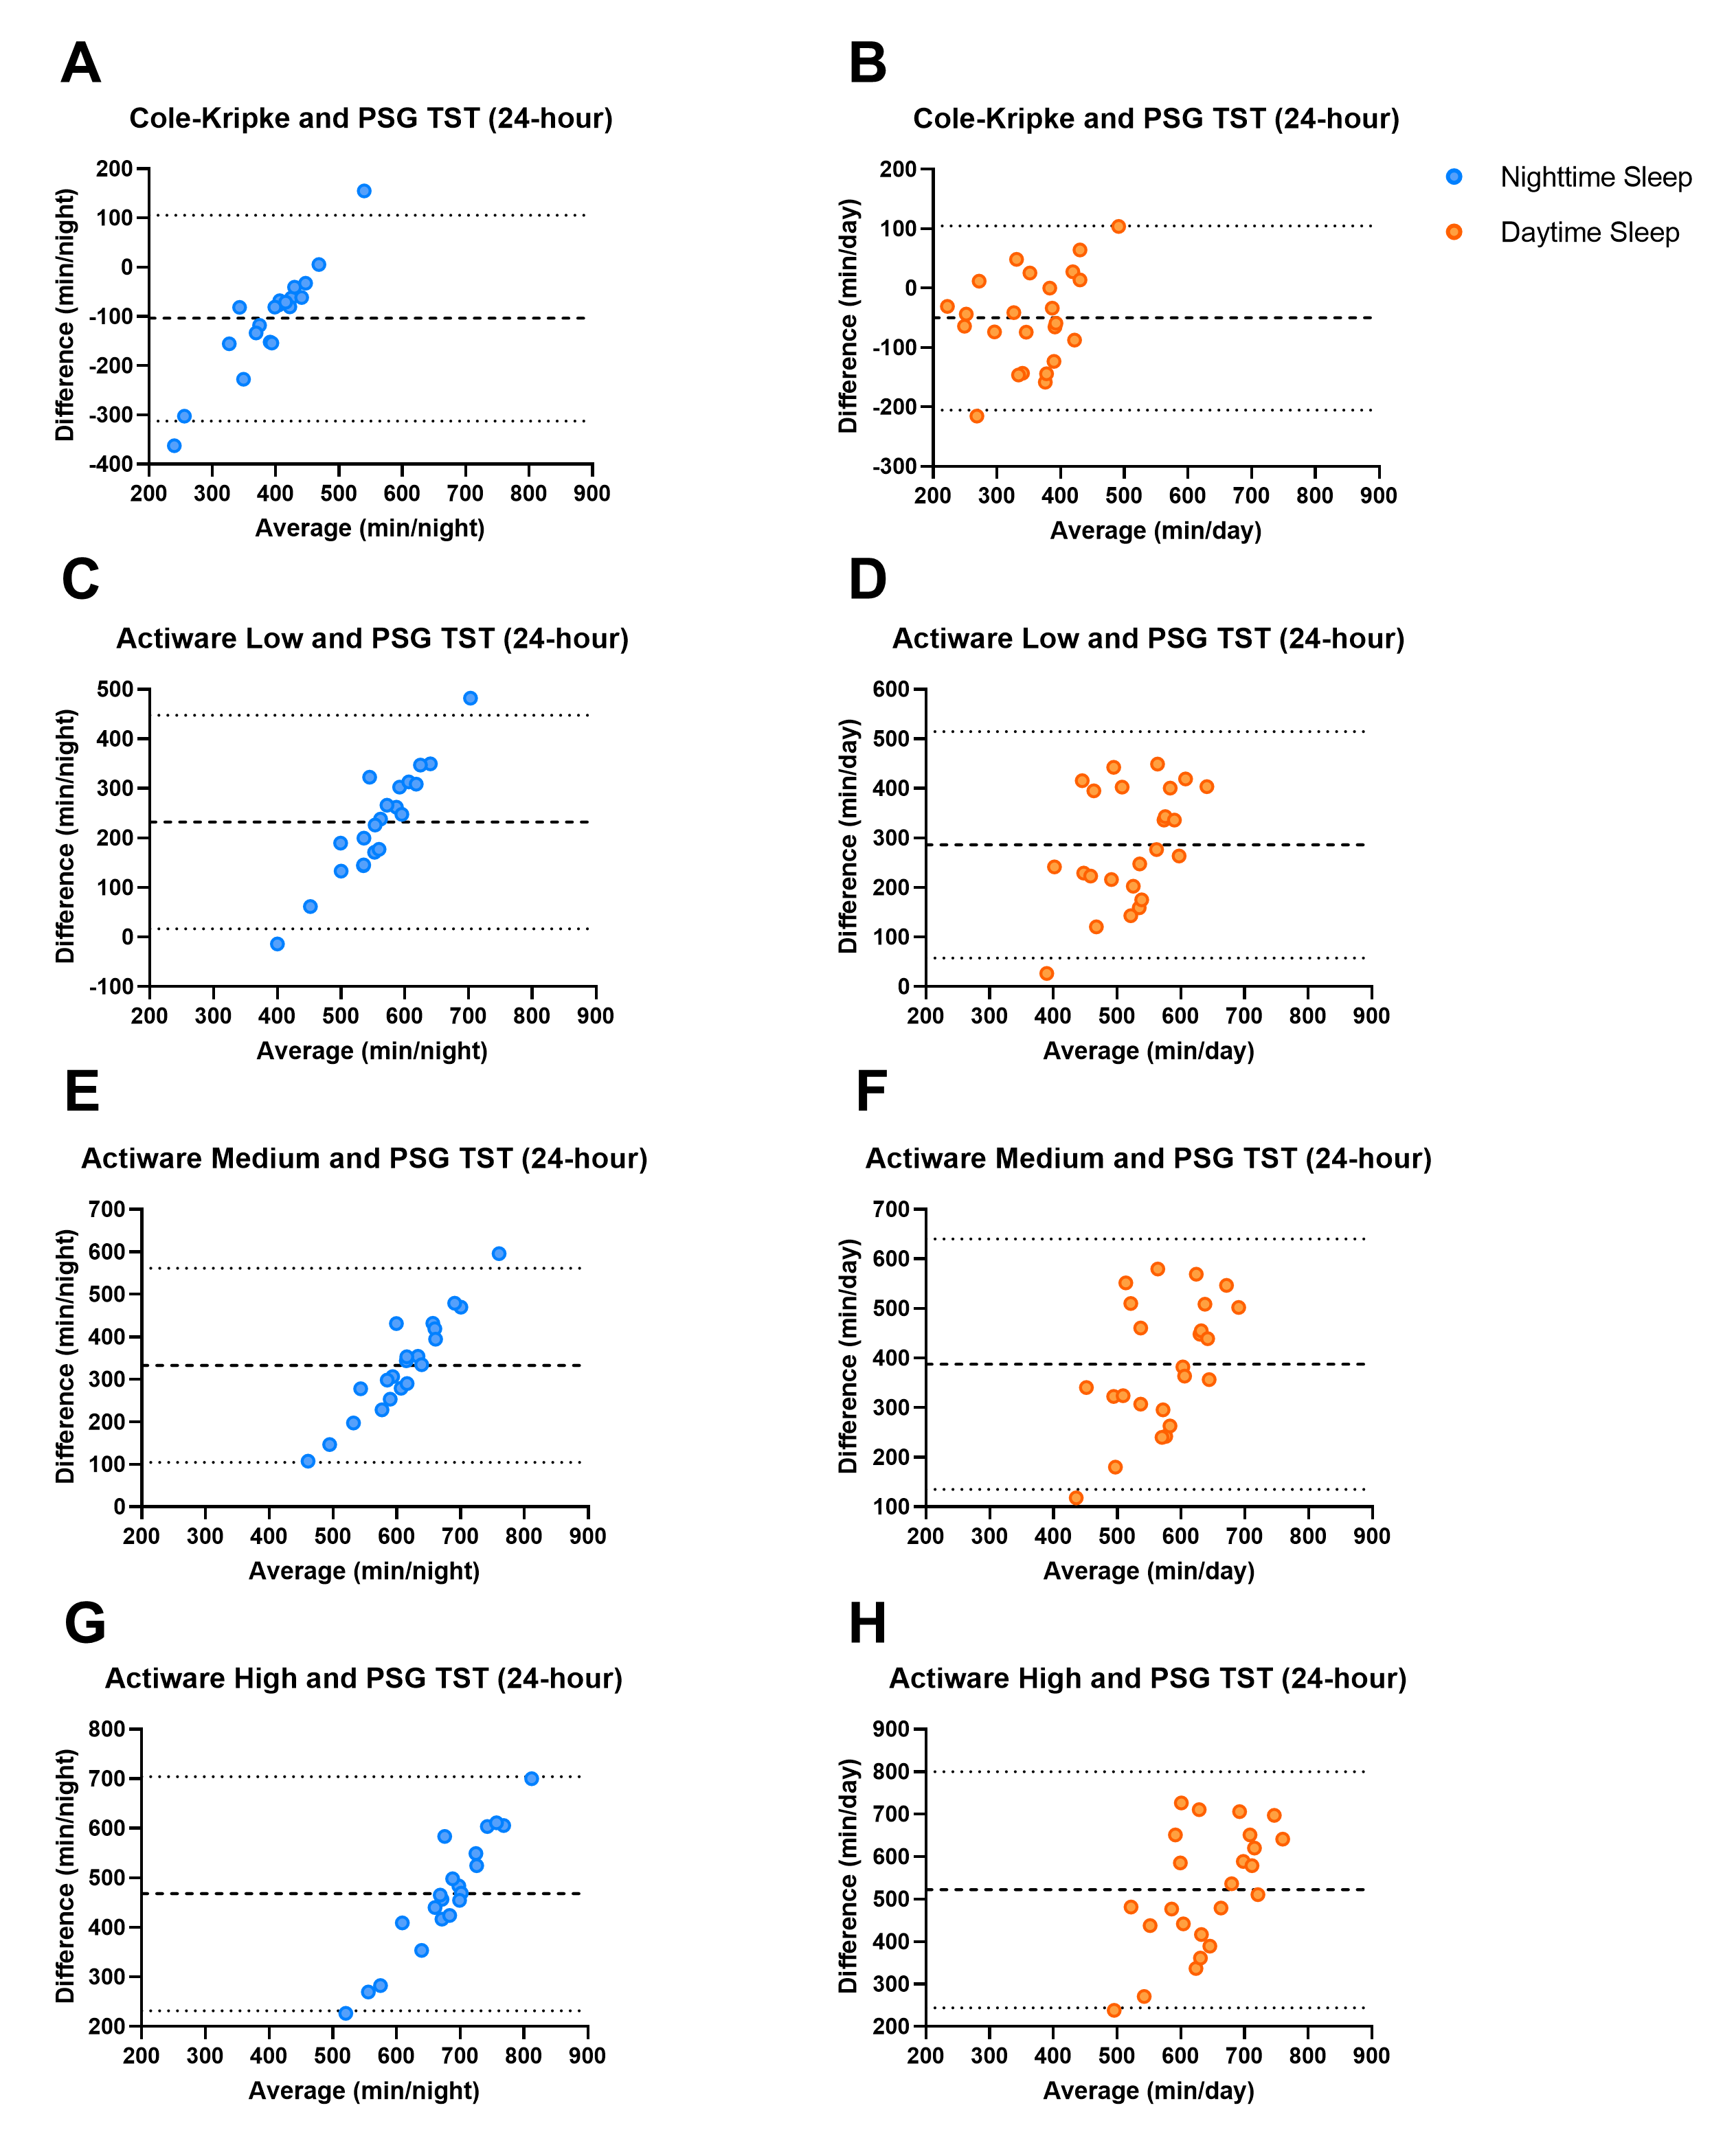

Supplement: Supplementary file 1 [file get_supplementary_file.php]
